# Supplementary material
Source: HighWire-hosted journal article supplement (http://www.jrheum.org/highwire/filestream/29793/field_highwire_adjunct_files/0/160053DataSuppl.pdf)
Supplement: 160053DataSuppl.pdf [file 160053DataSuppl.pdf]

**ONLINE SUPPLEMENTARY DATA**

*Supplementary Data 1*

Name:

Birth date:

Identification number:

Telephone number:

Comment:

| Questions 2013 |                                                                                                                                                                                                                                                                                                                                                                       | Yes                      | No                       |
|----------------|-----------------------------------------------------------------------------------------------------------------------------------------------------------------------------------------------------------------------------------------------------------------------------------------------------------------------------------------------------------------------|--------------------------|--------------------------|
| 1              | Have you experienced an <b>acute myocardial infarction</b> ?<br>- (If yes) When? _____<br>- (If yes) Where (hospital)? _____                                                                                                                                                                                                                                          | <input type="checkbox"/> | <input type="checkbox"/> |
| 2              | Have you undergone <b>heart surgery</b> (i.e. percutaneous coronary interventions or open heart surgery [coronary bypass operation])?<br>- (If yes) Percutaneous coronary intervention <input type="checkbox"/><br>- (If yes) Open heart surgery (coronary bypass operation) <input type="checkbox"/><br>- (If yes) When? _____<br>- (If yes) Where (Hospital)? _____ | <input type="checkbox"/> | <input type="checkbox"/> |
| 3              | Have you been diagnosed (by a doctor) with angina pectoris?<br>- (If yes) When? _____                                                                                                                                                                                                                                                                                 | <input type="checkbox"/> | <input type="checkbox"/> |
| 4              | Have you been diagnosed (by a doctor) with peripheral artery disease?<br>- (If yes) When? _____<br>- (If yes) Where (Hospital)? _____                                                                                                                                                                                                                                 | <input type="checkbox"/> | <input type="checkbox"/> |
| 5              | Have you experienced a cerebral stroke?<br>- (If yes) Hemorrhagic <input type="checkbox"/><br>- (If yes) Ischemic (blood clot) <input type="checkbox"/><br>- (If yes) When? _____<br>- (If yes) Where (Hospital)? _____                                                                                                                                               | <input type="checkbox"/> | <input type="checkbox"/> |
| 6              | Have you experienced a transitory ischemic attack (TIA)?<br>- (If yes) When? _____<br>- (If yes) Where (Hospital)? _____                                                                                                                                                                                                                                              | <input type="checkbox"/> | <input type="checkbox"/> |
| <b>Comment</b> |                                                                                                                                                                                                                                                                                                                                                                       |                          |                          |

*Supplementary Table 1.* Cox proportional hazard regression analyses for association between cardiovascular events and vascular risk biomarkers. Additional models for patients lost to follow-up.

| <b>Approach</b>                                                                                          | <b>aPWV (m/s)</b><br>HR (95% CI) | <b>Alx (%)</b><br>HR (95% CI) | <b>c-IMT (0.1mm)</b><br>HR (95% CI) |
|----------------------------------------------------------------------------------------------------------|----------------------------------|-------------------------------|-------------------------------------|
| <b>A) All patients lost to follow-up treated as though they were censored at baseline</b>                | 1.84 (1.32, 2.56)<br>p<0.001     | 1.05 (0.98, 1.13)<br>p=0.19   | 1.64 (1.27, 2.11)<br>p<0.001        |
| <b>B) Treating all patients lost to follow-up as though they had experienced CVD events at study end</b> | 1.53 (1.16, 2.03)<br>p=0.003     | 1.04 (0.98, 1.11)<br>p=0.20   | 1.50 (1.18, 1.91)<br>p=0.001        |

aPWV: aortic pulse wave velocity, Alx: augmentation index, c-IMT: carotid intima-media thickness, HR: hazard ratio, FU: follow-up, CVD: cardiovascular disease.

*Supplementary Table 2.* Cox Proportional Hazards Regression Models with Vascular CVD Risk Markers, excluding patients with previous CVD.

|                                                               | <b>aPWV</b><br>HR (95% CI)   | <b>Alx</b><br>HR (95% CI)   | <b>IMT</b><br>HR (95% CI)    |
|---------------------------------------------------------------|------------------------------|-----------------------------|------------------------------|
| <b>Unadjusted</b>                                             | 1.80 (1.31, 2.48)<br>p<0.001 | 1.03 (0.96, 1.11)<br>p=0.41 | 1.59 (1.23, 2.05)<br>p=0.000 |
| <b>Adjusted for demographic variables</b>                     |                              |                             |                              |
| Age (years)                                                   | 1.60 (1.06, 2.43)<br>p=0.027 | 0.99 (0.91, 1.08)<br>p=0.87 | 1.46 (1.07, 1.98)<br>p=0.016 |
| Sex (male)                                                    | 1.69 (1.20, 2.37)<br>p=0.003 | 1.06 (0.98, 1.15)<br>p=0.17 | 1.46 (1.12, 1.91)<br>p=0.005 |
| BMI (kg/m <sup>2</sup> )                                      | 1.79 (1.29, 2.49)<br>p=0.001 | 1.03 (0.96, 1.12)<br>p=0.39 | 1.57 (1.22, 2.01)<br>p=0.000 |
| <b>Adjusted for traditional CVD risk factors</b>              |                              |                             |                              |
| TC (mmol/L)                                                   | 1.75 (1.22, 2.51)<br>p=0.002 | 1.02 (0.94, 1.11)<br>p=0.67 | 1.68 (1.24, 2.28)<br>p=0.001 |
| LDL-c (mmol/L)                                                | 1.84 (1.29, 2.60)<br>p=0.001 | 1.02 (0.95, 1.11)<br>p=0.55 | 1.61 (1.22, 2.12)<br>p=0.001 |
| HDL-c (mmol/L)                                                | 1.88 (1.31, 2.70)<br>p=0.001 | 1.03 (0.95, 1.11)<br>p=0.48 | 1.66 (1.24, 2.22)<br>p=0.001 |
| TG (mmol/L)                                                   | 1.82 (1.30, 2.55)<br>p<0.001 | 1.03 (0.95, 1.11)<br>p=0.46 | 1.63 (1.24, 2.14)<br>p=0.000 |
| SysBP (mmHg)                                                  | 1.81 (1.28, 2.57)<br>p=0.001 | 1.01 (0.93, 1.09)<br>p=0.88 | 1.58 (1.19, 2.10)<br>p=0.001 |
| DiaBP (mmHg)                                                  | 1.89 (1.35, 2.63)<br>p<0.001 | 1.03 (0.95, 1.12)<br>p=0.41 | 1.69 (1.23, 2.31)<br>p=0.001 |
| Smoking current (daily)                                       | 1.85 (1.31, 2.61)<br>p=0.001 | 1.04 (0.96, 1.13)<br>p=0.34 | 1.59 (1.22, 2.08)<br>p=0.001 |
| Former smoker (daily)                                         | 1.80 (1.30, 2.49)<br>p<0.001 | 1.03 (0.96, 1.12)<br>p=0.42 | 1.79 (1.27, 2.52)<br>p=0.001 |
| <b>Adjusted for cardiovascular comorbidities (Yes vs. No)</b> |                              |                             |                              |
| Hypertension                                                  | 1.82 (1.30, 2.56)<br>p=0.001 | 1.01 (0.93, 1.10)<br>p=0.76 | 1.52 (1.14, 2.03)<br>p=0.004 |
| Diabetes                                                      | 1.80 (1.31, 2.47)<br>p<0.001 | 1.03 (0.96, 1.11)<br>p=0.43 | 1.60 (1.23, 2.06)<br>p<0.001 |
| <b>Adjusted for rheumatology disease variables</b>            |                              |                             |                              |
| Disase duration (years)                                       | 1.80 (1.30, 2.47)<br>p<0.001 | 1.03 (0.96, 1.11)<br>p=0.42 | 1.61 (1.24, 2.09)<br>p=0.000 |
| CRP (mg/dL)                                                   | 1.85 (1.30, 2.64)<br>p=0.001 | 1.03 (0.95, 1.11)<br>p=0.47 | 1.63 (1.23, 2.17)<br>p=0.001 |

|                                    |                              |                             |                              |
|------------------------------------|------------------------------|-----------------------------|------------------------------|
| ESR (mm/hr)                        | 1.84 (1.30, 2.61)<br>p=0.001 | 1.02 (0.94, 1.10)<br>p=0.60 | 1.56 (1.18, 2.07)<br>p=0.002 |
| DAS28                              | 1.84 (1.29, 2.63)<br>p=0.001 | 1.04 (0.96, 1.13)<br>p=0.31 | 1.74 (1.27, 2.39)<br>p=0.001 |
| <b>Adjusted for medication use</b> |                              |                             |                              |
| AntiHT                             | 1.79 (1.33, 2.41)<br>p<0.001 | 1.03 (0.96, 1.11)<br>p=0.39 | 1.73 (1.27, 2.38)<br>p=0.001 |
| Statins                            | 1.89 (1.28, 2.79)<br>p=0.001 | 1.04 (0.96, 1.13)<br>p=0.32 | 1.45 (1.10, 1.91)<br>p=0.008 |
| bDMARDs                            | 1.82 (1.32, 2.53)<br>p<0.001 | 1.03 (0.96, 1.11)<br>p=0.41 | 1.56 (1.21, 2.01)<br>p=0.001 |
| sDMARDs                            | 1.72 (1.25, 2.39)<br>p=0.001 | 1.03 (0.96, 1.10)<br>p=0.46 | 1.51 (1.17, 1.95)<br>p=0.002 |
| sDMARDs only                       | 1.77 (1.26, 2.49)<br>p=0.001 | 1.03 (0.96, 1.11)<br>p=0.44 | 1.58 (1.22, 2.06)<br>p=0.001 |
| Corticosteroids                    | 1.57 (1.15, 2.13)<br>p=0.004 | 1.02 (0.94, 1.10)<br>p=0.60 | 1.72 (1.28, 2.30)<br>p=0.000 |
| NSAIDs                             | 1.84 (1.31, 2.57)<br>p<0.001 | 1.03 (0.96, 1.11)<br>p=0.41 | 1.59 (1.23, 2.05)<br>p=0.000 |

Due to separation of the events, we were not able to assess CP as a predictor for CVD events using Cox PH regression. The HR with CI are estimated from a proportional hazards model including the vascular biomarker in addition to one additional covariate. Abbreviations as in Table 2.
